# Supplementary material for: Can neutral clusters: a two-step G0W0 and DFT benchmark
Source: publisher site journal article supplement (doi:10.3762/bjnano.15.82), 2024-08-08
Supplement: Additional file 1 [file 2190-4286-15-82-S1.pdf]

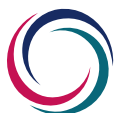

## Supporting Information

for

### **Ca<sub>n</sub> neutral clusters: a two-step G<sub>0</sub>W<sub>0</sub> and DFT benchmark**

Sunila Bakhsh, Sameen Aslam, Muhammad Khalid, Muhammad Sohail, Sundas Zafar, Sumayya Abdul Wadood, Kareem Morsy and Muhammad Aamir Iqbal

*Beilstein J. Nanotechnol.* **2024**, *15*, 1010–1016. [doi:10.3762/bjnano.15.82](https://doi.org/10.3762/bjnano.15.82)

## Additional experimental data

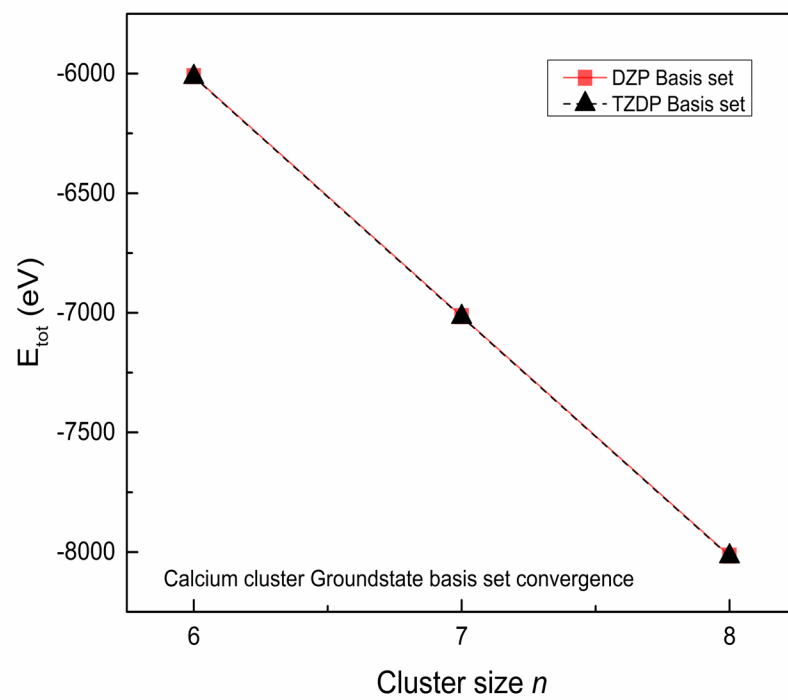

**Figure S1:** The DZP and TZDP basis set convergence results of the total energy of ground state calcium clusters for size  $n = 6-8$ .

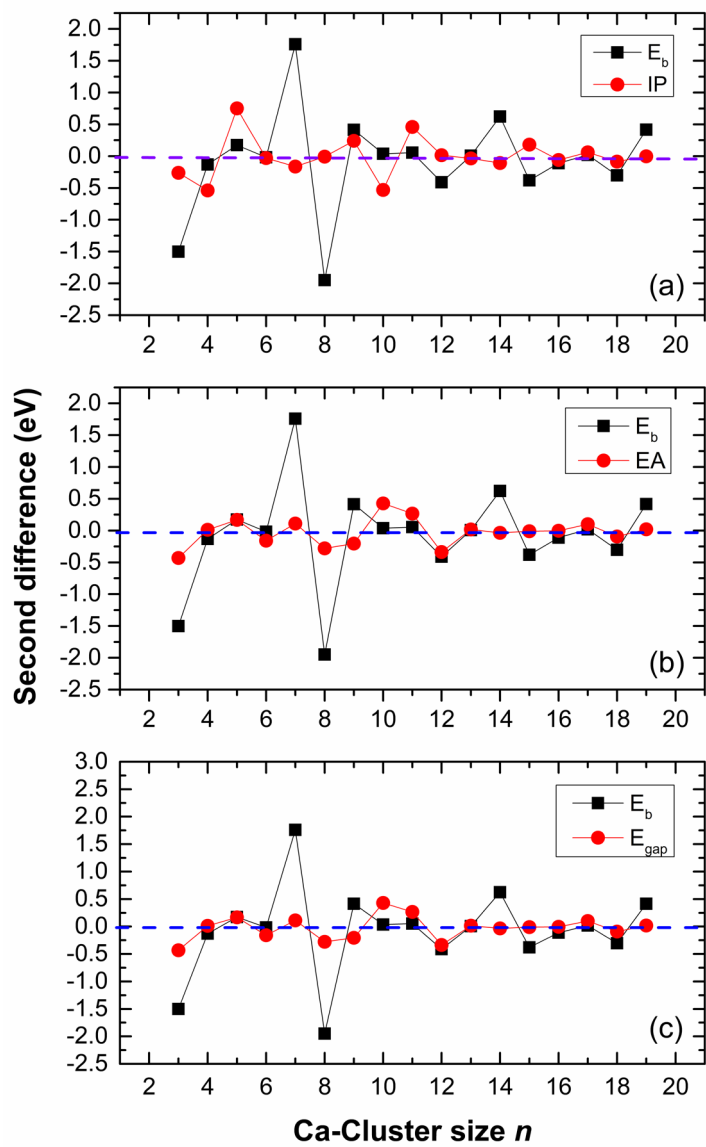

**Figure S2:** The second difference of energy for  $E_b$  versus a) IP, b) EA and, c)  $E_{gap}$ .

**The ground state geometry files are provided in XYZ format below:**

3:

```
atom 10.833176065055  10.317750000000  12.144787498620 Ca
atom 9.664883925490  12.180606632466  9.137200534686 Ca
atom 9.664883925490  8.454893367535  9.137200534685 Ca
```

4:

```
atom 8.960168136790  11.532807783015  8.960106654168 Ca
atom 11.532744417006  8.960241207357  8.960241206972 Ca
atom 11.532724238207  11.532444355830  11.532444355416 Ca
atom 8.960168135992  8.960106653797  11.532807783443 Ca
```

5:

```
atom 5.580859737505  5.504299999975  8.499691822744 Ca
atom 5.580859281894  5.504299999972  1.999348074752 Ca
atom 3.532854309305  5.504300000007  5.249521551292 Ca
atom 6.608578748135  3.720961914433  5.249521770605 Ca
atom 6.608578748145  7.287638085539  5.249521770604 Ca
```

6:

```
atom 6.097958149777  1.809137534915  5.508531960574 Ca
atom 5.028515091569  5.066023558045  7.266071046153 Ca
atom 5.023809343590  5.065969641420  3.754705599254 Ca
atom 5.518779752617  8.312453441437  5.509800508595 Ca
atom 8.290376714087  5.388440321591  5.506494041479 Ca
atom 1.863344384364  6.344698220586  5.514633393965 Ca
```

7:

```
atom 7.212460133705  8.065481879939  5.462173039224 Ca
atom 5.392512056436  1.804576195115  5.462070267524 Ca
atom 5.393582829756  5.165406952071  3.743545853803 Ca
atom 8.651208030106  4.443866790440  5.463617771039 Ca
```

atom 5.392046583451 5.165525790206 7.180385296798 Ca  
atom 2.134468752206 4.443267367219 5.460794610913 Ca  
atom 3.571795414352 8.064615271018 5.461401060691 Ca

8:

atom 13.046813582334 9.941752879045 13.308778267410 Ca  
atom 11.564029619015 10.361236652804 9.971060865454 Ca  
atom 15.274755316530 10.389943950399 10.418541469294 Ca  
atom 13.231557630514 13.144047286364 11.718197588257 Ca  
atom 12.810226348983 12.856075908408 15.421607725608 Ca  
atom 10.693425097439 9.897324924124 16.175893584205 Ca  
atom 16.094001522032 11.957250827966 13.712052307584 Ca  
atom 10.003112123166 11.867326085884 13.102865102252 Ca

9:

atom 10.385602086230 9.961683368563 11.783025201576 Ca  
atom 7.257640539800 11.782479099888 12.228007507681 Ca  
atom 7.261688881845 8.224259301521 11.057752872286 Ca  
atom 13.511478371425 8.226374931814 11.062706934255 Ca  
atom 13.511566143155 11.784928622459 12.232393846185 Ca  
atom 10.385032705395 13.464983898157 10.865410510420 Ca  
atom 8.525529269520 10.929373016834 8.836969317548 Ca  
atom 10.388337627178 7.687420171827 8.962481769784 Ca  
atom 12.249271095435 10.930455582960 8.839795590249 Ca

10:

atom 10.492678464022 10.492673809227 10.650711963591 Ca  
atom 8.354080700416 8.354874422192 9.404701663324 Ca  
atom 12.631196526045 12.630566357695 9.404676005979 Ca  
atom 12.631058023249 8.354686888915 9.404619308014 Ca  
atom 8.353944660128 12.630375835397 9.404772051386 Ca  
atom 10.492632112017 10.492757247144 7.158166156144 Ca

|      |                 |                 |                 |    |
|------|-----------------|-----------------|-----------------|----|
| atom | 10.492701077203 | 7.772781161367  | 12.594428408044 | Ca |
| atom | 10.492706875667 | 13.212528458539 | 12.594409791118 | Ca |
| atom | 13.211342974498 | 10.492630837141 | 12.595557184226 | Ca |
| atom | 7.774158586794  | 10.492624982345 | 12.595809015216 | Ca |

11:

|      |                 |                 |                 |    |
|------|-----------------|-----------------|-----------------|----|
| atom | 10.408476989859 | 10.408155379662 | 10.800215055829 | Ca |
| atom | 10.408282332533 | 10.408450532312 | 7.015359495803  | Ca |
| atom | 10.407945656452 | 10.408425944249 | 14.584166408307 | Ca |
| atom | 11.535828914363 | 13.129788950354 | 9.222481729910  | Ca |
| atom | 9.280763624795  | 7.686886271543  | 9.221200744935  | Ca |
| atom | 7.686933716995  | 11.535874494659 | 9.221717060702  | Ca |
| atom | 13.129945109060 | 9.280692813738  | 9.222275853011  | Ca |
| atom | 11.535707524921 | 7.686462671220  | 12.377830438218 | Ca |
| atom | 9.280642169922  | 13.129893766038 | 12.377668165833 | Ca |
| atom | 13.129785730398 | 11.535793097787 | 12.378580451431 | Ca |
| atom | 7.686438230703  | 9.280742408389  | 12.377070593015 | Ca |

12:

|      |                 |                 |                 |    |
|------|-----------------|-----------------|-----------------|----|
| atom | 12.844523371080 | 13.008637884103 | 13.441474630934 | Ca |
| atom | 10.029882734546 | 14.881969279538 | 14.725468446801 | Ca |
| atom | 10.095641300049 | 11.033412766620 | 14.716078455899 | Ca |
| atom | 15.570100078384 | 14.960139914366 | 12.091279335753 | Ca |
| atom | 15.635187613356 | 11.157408245335 | 12.082662585001 | Ca |
| atom | 11.950474408905 | 16.073961522385 | 11.747856885505 | Ca |
| atom | 12.056079050039 | 9.921185589700  | 11.733181112568 | Ca |
| atom | 15.952639666507 | 13.057563990649 | 15.287627459241 | Ca |
| atom | 9.778684806327  | 12.959531387243 | 11.528605941206 | Ca |
| atom | 13.651311541214 | 16.134983649016 | 15.075662094827 | Ca |
| atom | 13.757659329674 | 9.903556225262  | 15.061280080327 | Ca |
| atom | 13.188185931839 | 13.022473005790 | 9.852864023953  | Ca |

13:

|      |                 |                 |                 |    |
|------|-----------------|-----------------|-----------------|----|
| atom | 10.627935192471 | 8.692806483707  | 7.526735298034  | Ca |
| atom | 10.626947808193 | 12.516761584926 | 7.526550640790  | Ca |
| atom | 7.564140546725  | 10.605162770093 | 8.724522481821  | Ca |
| atom | 8.718086605344  | 7.511675757299  | 10.619769816321 | Ca |
| atom | 12.493775609911 | 7.511457102698  | 10.590620484595 | Ca |
| atom | 13.672245676899 | 10.604678179572 | 8.678734505620  | Ca |
| atom | 12.491618377452 | 13.697653411904 | 10.589967677585 | Ca |
| atom | 8.716421167135  | 13.698587681745 | 10.619230922662 | Ca |
| atom | 10.582238425078 | 12.516964293131 | 13.682874610973 | Ca |
| atom | 13.645391566963 | 10.604727881406 | 12.484829138088 | Ca |
| atom | 10.583331678708 | 8.693141828895  | 13.683417249108 | Ca |
| atom | 7.537362761275  | 10.605256730237 | 12.531406028053 | Ca |
| atom | 10.604416681839 | 10.604826294387 | 10.604829048316 | Ca |

14:

|      |                 |                 |                 |    |
|------|-----------------|-----------------|-----------------|----|
| atom | 10.868914718045 | 8.559639529307  | 13.501584747872 | Ca |
| atom | 13.936744451979 | 10.437567350142 | 12.307025561650 | Ca |
| atom | 12.736562311603 | 13.499983240111 | 10.424118645657 | Ca |
| atom | 8.902909342192  | 13.535212616397 | 10.506230626899 | Ca |
| atom | 7.759057282117  | 10.509883895299 | 12.391527874367 | Ca |
| atom | 10.785681457256 | 12.393643870479 | 13.534429057397 | Ca |
| atom | 8.988736925728  | 7.357394200132  | 10.438368309264 | Ca |
| atom | 12.795542450236 | 7.339542311524  | 10.412603112976 | Ca |
| atom | 13.955270863112 | 10.408824015884 | 8.500180965869  | Ca |
| atom | 7.794841367032  | 10.423808550946 | 8.557694813407  | Ca |
| atom | 10.885275591936 | 8.497067732685  | 7.341113856845  | Ca |
| atom | 10.858510123594 | 12.303702447135 | 7.356766701895  | Ca |
| atom | 10.890410606401 | 10.404039104016 | 10.404558769454 | Ca |
| atom | 7.409340733765  | 13.888118804976 | 13.882224625403 | Ca |

15:

|      |                 |                 |                 |    |
|------|-----------------|-----------------|-----------------|----|
| atom | 10.153181848056 | 9.868258478728  | 15.200282044134 | Ca |
| atom | 10.378523184025 | 10.186428408192 | 11.624591585208 | Ca |
| atom | 10.668581998706 | 10.595328143126 | 7.898208723423  | Ca |
| atom | 13.599032155455 | 9.474631992648  | 9.933067807942  | Ca |
| atom | 12.440323579120 | 13.016071358106 | 10.252878978951 | Ca |
| atom | 8.713256425984  | 13.039653477156 | 9.944049438439  | Ca |
| atom | 7.462380147322  | 9.400437596501  | 9.700412028454  | Ca |
| atom | 10.514537679519 | 7.173599029486  | 9.693815514140  | Ca |
| atom | 7.235453272412  | 11.083703041656 | 13.065740993216 | Ca |
| atom | 8.387799065431  | 7.454032742328  | 12.852808637363 | Ca |
| atom | 12.196217088602 | 7.464352202610  | 13.055850283981 | Ca |
| atom | 13.340062662394 | 11.034849108918 | 13.449683222189 | Ca |
| atom | 10.288080947330 | 13.262410051306 | 13.455969313503 | Ca |
| atom | 13.977449281801 | 11.961598568626 | 7.092225432485  | Ca |
| atom | 10.956872439806 | 14.165309984603 | 7.099366659586  | Ca |

16:

|      |                 |                 |                 |    |
|------|-----------------|-----------------|-----------------|----|
| atom | 10.503291057569 | 9.800978602681  | 9.849876747700  | Ca |
| atom | 10.499562510900 | 14.734442806382 | 13.275311174071 | Ca |
| atom | 10.502971597941 | 7.409152257998  | 12.534452086284 | Ca |
| atom | 13.587679032393 | 9.619744204717  | 11.859300100967 | Ca |
| atom | 12.381676216878 | 12.948747876455 | 10.569860930482 | Ca |
| atom | 8.621711246024  | 12.947100068261 | 10.567928785476 | Ca |
| atom | 7.417260461940  | 9.617149172765  | 11.855884716712 | Ca |
| atom | 8.590042962381  | 6.829009109280  | 9.338756458615  | Ca |
| atom | 12.419965090538 | 6.830627073154  | 9.340824322225  | Ca |
| atom | 10.505713235526 | 8.541222520068  | 6.494642280230  | Ca |
| atom | 7.439065665442  | 10.202656233077 | 8.048577057339  | Ca |
| atom | 10.503698232200 | 12.255667701481 | 7.246374526773  | Ca |
| atom | 13.569466545057 | 10.205372907959 | 8.051870874808  | Ca |
| atom | 7.303201099162  | 12.764994508179 | 14.032085166816 | Ca |



atom 10.501011811166 11.137670948368 13.354700218413 Ca  
atom 13.696883234884 12.767910349160 14.035325753126 Ca

17:

atom 14.711761913330 15.767310590507 18.386199186083 Ca  
atom 14.050246086204 14.482517387354 10.149391211346 Ca  
atom 16.568308971913 12.932898364401 16.683272747110 Ca  
atom 10.679302224127 12.851614946375 10.747347534786 Ca  
atom 16.602198845593 13.409840246899 12.847605921756 Ca  
atom 9.798311546043 13.474755002311 14.382504499391 Ca  
atom 13.054661388862 12.934198786344 13.152927155733 Ca  
atom 14.418440011500 15.206202804042 15.064501497540 Ca  
atom 15.634890102366 17.121723402885 12.370603925085 Ca  
atom 12.728648030514 12.492576577994 16.703660192636 Ca  
atom 11.382892589578 16.114009045982 16.603709169611 Ca  
atom 14.110818379566 10.746826973331 10.800266809785 Ca  
atom 11.878320248055 16.308154104149 12.775035535472 Ca  
atom 14.983776144150 10.293549223422 14.462574383929 Ca  
atom 11.297044266213 10.079999741555 13.602243008329 Ca  
atom 14.093515069088 18.539815230953 15.531902208652 Ca  
atom 17.526300400837 16.433495803608 15.584844876745 Ca

18:

atom 10.744530499686 10.828628977772 9.408808049280 Ca  
atom 10.747079991013 10.832057516801 13.016817716531 Ca  
atom 9.738836671849 7.712640303378 11.214371831117 Ca  
atom 13.399975067164 8.908798268889 11.210525054434 Ca  
atom 13.393589447549 12.760348826184 11.206742239561 Ca  
atom 9.728604879026 13.944848269910 11.208351540491 Ca  
atom 7.469440956772 10.825139350621 11.212673759752 Ca  
atom 13.983702927128 10.832171823349 7.910570410907 Ca  
atom 11.740346344512 13.910194219232 7.909081939300 Ca

|      |                 |                 |                 |    |
|------|-----------------|-----------------|-----------------|----|
| atom | 8.119561668507  | 12.728000177879 | 7.912723867308  | Ca |
| atom | 8.125566681751  | 8.918547735412  | 7.916253588025  | Ca |
| atom | 11.749685375385 | 7.747448862317  | 7.914858331782  | Ca |
| atom | 14.045770288387 | 10.839051183072 | 14.406697132227 | Ca |
| atom | 11.761453766213 | 13.970231435531 | 14.405950428418 | Ca |
| atom | 8.077451042031  | 12.766512006736 | 14.409587125223 | Ca |
| atom | 8.083734261430  | 8.891420210219  | 14.413221960418 | Ca |
| atom | 11.772004066392 | 7.700225010729  | 14.412308754110 | Ca |
| atom | 10.742065751224 | 10.825535821969 | 5.861570175080  | Ca |

19:

|      |                 |                 |                 |    |
|------|-----------------|-----------------|-----------------|----|
| atom | 11.264468743402 | 13.787254725616 | 18.561825816611 | Ca |
| atom | 15.355698896911 | 15.489437980506 | 10.412240560288 | Ca |
| atom | 17.099103777981 | 14.291360761239 | 16.248958379114 | Ca |
| atom | 19.038273831058 | 11.948376908596 | 13.863170864053 | Ca |
| atom | 14.190802460169 | 16.213485717315 | 17.906421825006 | Ca |
| atom | 18.319747333552 | 15.537912237054 | 12.806810694472 | Ca |
| atom | 14.909463402401 | 12.624409744189 | 18.963222954407 | Ca |
| atom | 18.009931915343 | 12.685060650092 | 10.228923106621 | Ca |
| atom | 13.486893183610 | 13.431771461752 | 15.799471635695 | Ca |
| atom | 15.771730595778 | 13.057591160608 | 12.976524877909 | Ca |
| atom | 10.113837715629 | 12.544796166850 | 15.090273549549 | Ca |
| atom | 12.988901339152 | 10.594336699520 | 13.410665735977 | Ca |
| atom | 11.226770169179 | 16.165133404337 | 15.512047887436 | Ca |
| atom | 14.804533741143 | 16.495508766467 | 14.099018768702 | Ca |
| atom | 15.976767263354 | 10.641979903468 | 15.824100401673 | Ca |
| atom | 16.519137315381 | 9.681589996598  | 12.124000774716 | Ca |
| atom | 12.390164230793 | 10.357717921678 | 17.223236420553 | Ca |
| atom | 14.242995324067 | 11.868578874130 | 9.990375509771  | Ca |
| atom | 12.266164157089 | 14.210945045066 | 12.345895607450 | Ca |

20:

|      |                 |                 |                 |    |
|------|-----------------|-----------------|-----------------|----|
| atom | 13.566613688294 | 13.182969684549 | 15.620392122531 | Ca |
| atom | 12.721711689435 | 13.842806994966 | 9.757051303869  | Ca |
| atom | 13.782180630384 | 15.460487483155 | 12.833239743900 | Ca |
| atom | 10.921466499385 | 12.996853295842 | 12.932211753129 | Ca |
| atom | 12.351961017458 | 9.931544544609  | 14.543917123455 | Ca |
| atom | 16.019281688226 | 10.590907779498 | 15.629079389843 | Ca |
| atom | 16.531456211284 | 17.715830490674 | 12.917468520835 | Ca |
| atom | 12.950199971645 | 18.841648936887 | 13.560115361675 | Ca |
| atom | 13.956986093548 | 17.617701320166 | 10.029983480600 | Ca |
| atom | 10.639133980074 | 16.574403531990 | 11.563807662520 | Ca |
| atom | 11.745000655012 | 10.193378189468 | 10.705439758084 | Ca |
| atom | 14.642715715292 | 11.827326487268 | 12.263979252262 | Ca |
| atom | 16.413319489292 | 14.759094619202 | 10.527399629413 | Ca |
| atom | 13.319213033802 | 10.869384950459 | 18.290127369826 | Ca |
| atom | 16.943306148362 | 14.132917581570 | 14.325635928519 | Ca |
| atom | 14.764613118916 | 16.654928593568 | 16.217103662556 | Ca |
| atom | 11.089069937369 | 15.972843439964 | 15.376314815104 | Ca |
| atom | 10.245118193312 | 12.405834444487 | 16.665760579728 | Ca |
| atom | 16.133850163347 | 13.514477618907 | 18.060093245789 | Ca |
| atom | 12.552490303573 | 14.639831481793 | 18.703084567287 | Ca |
